# Supplementary material for: Impact of Topoisomerase IIα, PTEN, ABCC1/MRP1, and KI67 on triple-negative breast cancer patients treated with neoadjuvant chemotherapy
Source: Springer Nature journal article supplement (doi:10.1007/s10549-018-4985-6), 2018-10-10
Supplement: MOESM2 [file 16188978]

**Title page**

**Title: Impact of Topoisomerase IIα, PTEN, ABCC1/MRP1 and KI67 on triple-negative breast cancer patients treated with neoadjuvant chemotherapy**

**Running head: Triple-negative breast cancer: bridging the molecular profile to targeted treatment**

**Authors:** Fouzia 1Guestini; Katsuhiko 1Ono; Minoru 1Miyashita; Takanori 1Ishida; Noriaki 1Ohuchi; Saki 1Nakagawa; Hisashi 2Hirakawa; Kentaro 3Tamaki; Yasuyo 4Oi; Yoshiaki 4Rai; Yoshiaki 4Sagara; Hironobu 1Sasano; Keely May 1McNamara.

**Affiliations:**

1. Tohoku University,

2. Tohoku Kousai Hospital

3. Nahanishi Clinic,

4. Sagara Hospital

Table S2 Immunohistochemistry conditions and assessment methodology.

Table (a) indicates the immunohistochemistry conditions and the immunoreactivity characteristics for the markers. The antibodies used for the immunohistochemistry. The primary antibody used for p53 recognized both wild type and mutant forms of human p53 protein under denaturing and non-denaturing conditions. The column localization indicates the positive immunoreactivity that was considered for the markers. The references are those for which the same clone of antibody was used and for the consideration of the localization of the immunoreactivity, respectively.

Table (b) indicates the immunoscoring system used for each marker and the corresponding reference. PTEN was defined as negative if PTEN immunoreactivity was undetectable in tumor cells in contrast to the normal ductal epithelium and adjacent normal stromal cells [43]. Positive with vimentin immunoreactivity was detected in fibroblasts, endothelial cells, lymphocytes and negative vimentin immunoreactivity in epithelial cells in non-neoplastic tubules served as negative control [38]. Coexisting reactive lymphocytes to Bcl2 antibody [44] and KI67 [45] served as internal positive and negative controls, respectively.


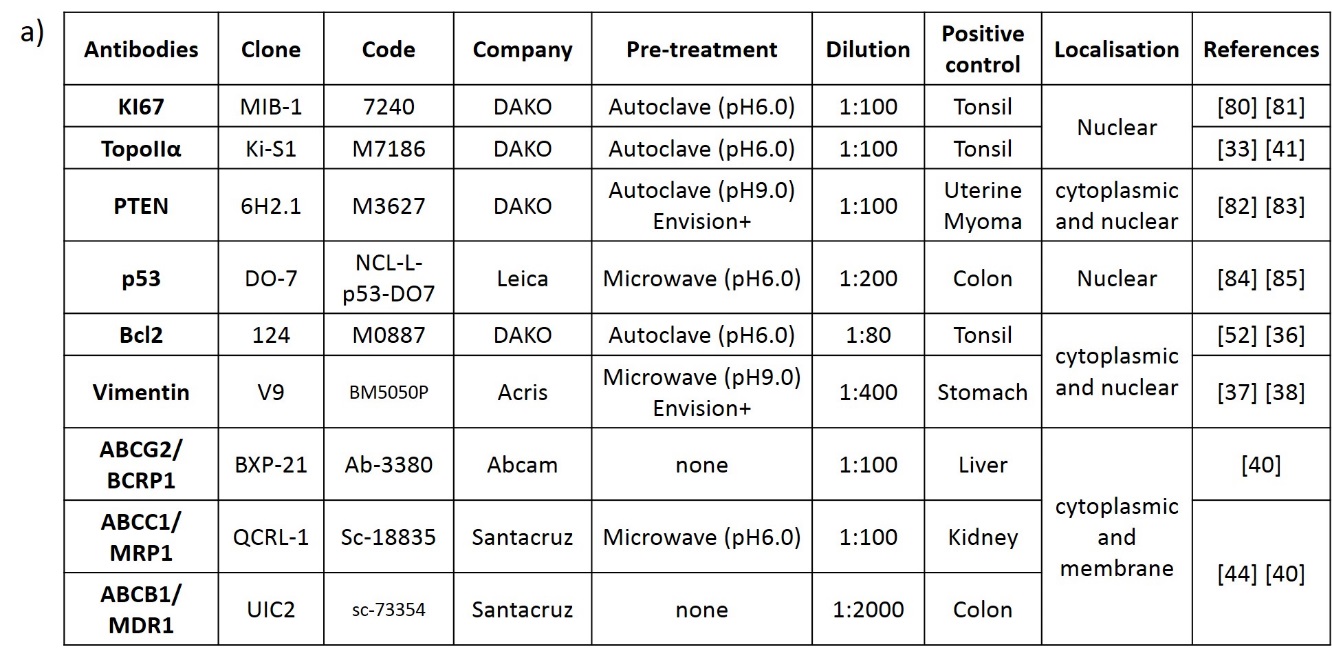


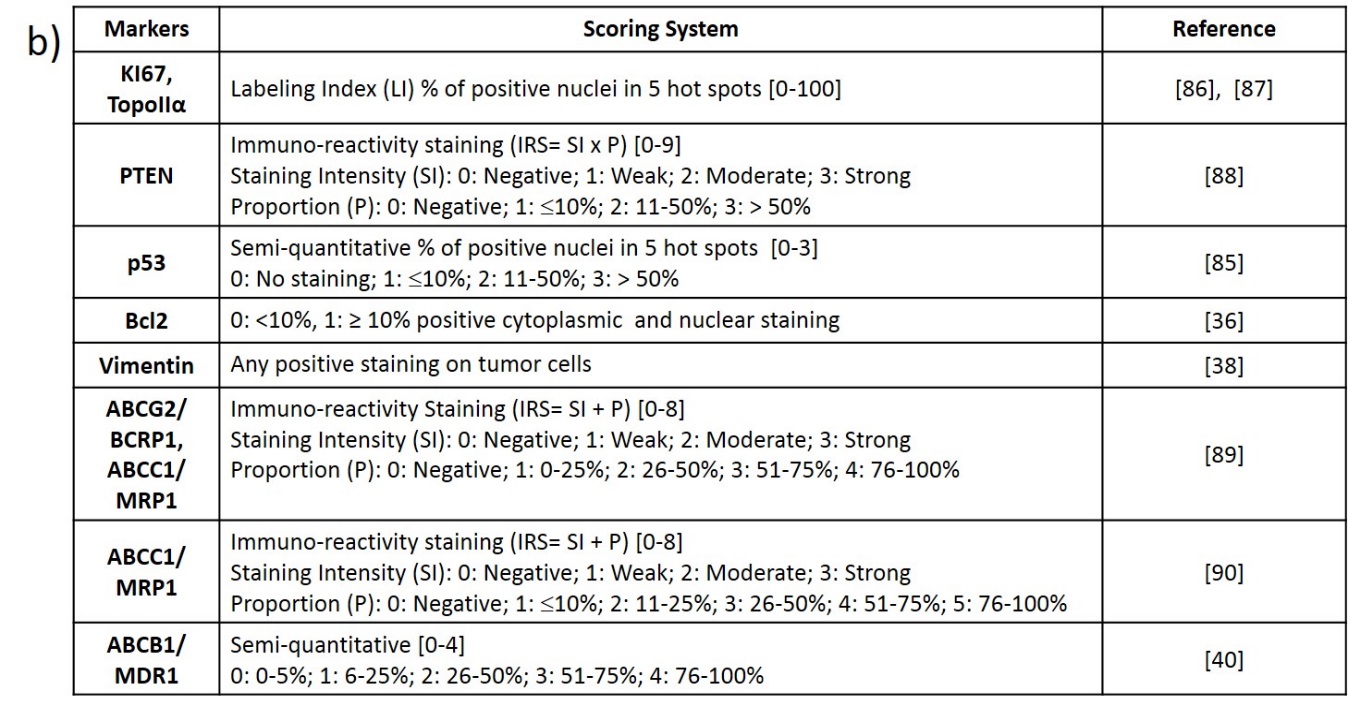


Table (a) indicates the immunohistochemistry conditions and the antibodies used for the immunohistochemistry. The primary antibody used for p53 recognized both wild type and mutant forms of human p53 protein under denaturing and non-denaturing conditions. The column localization indicates the positive immunoreactivity that was considered for the markers. The references are those for which the same clone of antibody was used and for the consideration of the localization of the immunoreactivity, respectively.

Table (b) indicates the immunoscoring system used for each marker and the corresponding reference. PTEN was defined as negative if PTEN immunoreactivity was undetectable in tumor cells in contrast to the normal ductal epithelium and adjacent normal stromal cells [43]. Positive with vimentin immunoreactivity was detected in fibroblasts, endothelial cells, lymphocytes and negative vimentin immunoreactivity in epithelial cells in non-neoplastic tubules served as negative control [38]. Coexisting reactive lymphocytes to Bcl2 antibody [44] and KI67 [45] served as internal positive and negative controls, respectively.
